***ANTHESSIUS ANTARCTICUS* N. SP. (COPEPODA: POECILOSTOMATOIDA:  
ANTHESSIIDAE) FROM ANTARCTIC WATERS LIVING IN ASSOCIATION WITH  
*CHARCOTIA GRANULOSA* (MOLLUSCA: NUDIBRANCHIA: CHARCOTIIDAE)**

Juan Moles<sup>1,\*</sup>, Conxita Avila<sup>1</sup>, and Il-Hoi Kim<sup>2</sup>

<sup>1</sup> Department of Animal Biology (Invertebrates) and Biodiversity Research Institute (IrBIO), University of Barcelona, Avinguda Diagonal 643, 08028 Barcelona, Spain

<sup>2</sup> Department of Biology, Gangneung-Wonju National University, Gangneung 210-702, South Korea

A B S T R A C T

A new species of the genus *Anthessius* Della Valle, 1880 is described under the name *A. antarcticus*. It is ectosymbiont of the nudibranch *Charcotia granulosa* Vayssière, 1906 from the South Shetland Islands in the Southern Ocean. The female of the new species is distinguished from its congeners by the following combination of diagnostic morphological characters: 1) antenna with two terminal claws; 2) mandible with a seta between distal and outer lashes; 3) third exopodal segment of leg 4 with four spines and five setae (formula: III, I, 5); and 4) caudal ramus 2.40 times as long as wide. Its relationship with its congeners and other anthessiid genera are discussed. This is the first species of the genus found to be related to a nudibranch, and remarkably, it is also the only record of Anthessiidae from Antarctica.

**KEY WORDS:** *Anthessius antarcticus* n. sp., Deception Island, ectosymbiosis, marine benthos, sea slug

DOI: 10.1163/1937240X-00002290

INTRODUCTION

Copepods have been highly successful in forming associations with other marine organisms, among which molluscs seem to be one of the most preferred partners. According to Ho (1997), a total of 246 copepod species have been described in association with 458 species of mollusc. These symbionts belong to five orders: Harpacticoida, Misophrioida, Cyclopoida, Siphonostomatoida, and Poecilostomatoida, the last of which includes about 73% of the known copepod associates of Mollusca. Indeed, poecilostomatoid species of the family Anthessiidae are mostly associated with molluscs (Boxshall and Halsey, 2004a, b), while some are found associated with algae, plankton, crustaceans, and teleost fish (Ho, 1997; Conradi et al., 2012). Copepods in Anthessiidae are currently classified into five genera: *Anthessius* Della Valle, 1880, *Katanthessius* Stock, 1960, *Neanthessius* Izawa, 1976, *Panaetis* Stebbing, 1900, and *Rhinomolgus* Sars, 1918 (Humes, 1986; Boxshall and Halsey, 2004a, b). *Anthessius* is the most speciose genus in the family, with species generally associated with marine bivalves and gastropods, some of which are of commercial importance (Uyeno and Nagasawa, 2012). There are 44 nominal species of *Anthessius* described to date, all of them inhabiting temperate and warm waters (Conradi et al., 2012; Uyeno and Nagasawa, 2012; Walter and Boxshall, 2014). Among them only 11 species are associated with opisthobranchs, generally from the orders Anaspiidea and Pleurobranchomorpha, but they have never been found in association with nudibranchs (Illg, 1960; Stock et al., 1963; Humes and Ho, 1965). Although more than 50 species of Anthessi-

idae have been recorded worldwide, none of them is known from the Southern Ocean. The present study reports a new species of *Anthessius* as the first record from Antarctic waters and the first association with a nudibranch, *Charcotia granulosa* Vayssière (Charcotiidae).

MATERIALS AND METHODS

A total of 64 specimens of the nudibranch *Charcotia granulosa* were collected by SCUBA-diving in Port Foster, Deception Island (South Shetland Islands, Antarctica) during the ACTIQUIM-4 cruise in February, 2013. One specimen of the copepod *Anthessius antarcticus* n. sp. was found in ectosymbiosis on *C. granulosa* collected in the area of Whalers Bay (62°59.33'S, 60°33.45'W), 14 m water depth. *Charcotia granulosa* specimens were collected from shallow rocky bottoms where its prey, the bryozoan *Beania erecta*, was abundant, covering the substrate and other sessile animals. The benthic ecosystem was dominated by demosponges (*Mycale (Oxymycale) acerata*, *Dendrilla antarctica*), soft corals (*Alcyonium hadroni*), solitary ascidians (*Cnemidocarpa verrucosa*), and wandering fauna (mainly echinoderms: *Odontaster validus*, *Ophionotus victoriae*, *Sterechinus neumayeri*). Other nudibranch species were collected in the area: 18 specimens of *Doris kerguelensis* (Bergh, 1884) and four of *Cuthona crinita* Minichev, 1972, but no *Anthessius* spp. or other ectosymbiotic copepods were found.

Prior to preservation in 96% ethanol, the holotype was photographed alive with a camera (Invenio 5S 5MPixel CMOS) adapted to a stereomicroscope (Zeiss Stemi 2000-C) (Fig. 1). The animal was transferred to the Department of Animal Biology at the University of Barcelona for further morphological analysis. The organism in 96% ethanol was dehydrated in a graded series of alcohol, dried to the critical point, mounted, carbon-coated, and imaged using a Hitachi H-4100FE scanning electron microscope (SEM) (University of Barcelona) (Fig. 2). Live and SEM photographs were edited using Adobe Photoshop CS6, making the background black and enhancing contrast. Following SEM micrography, the animal was restored for anatomical analysis. Carbon-coating was partly removed by treating the sample with HCN gas for three days, following the method of Leslie and Mitchell

\* Corresponding author; e-mail: moles.sanchez@gmail.com

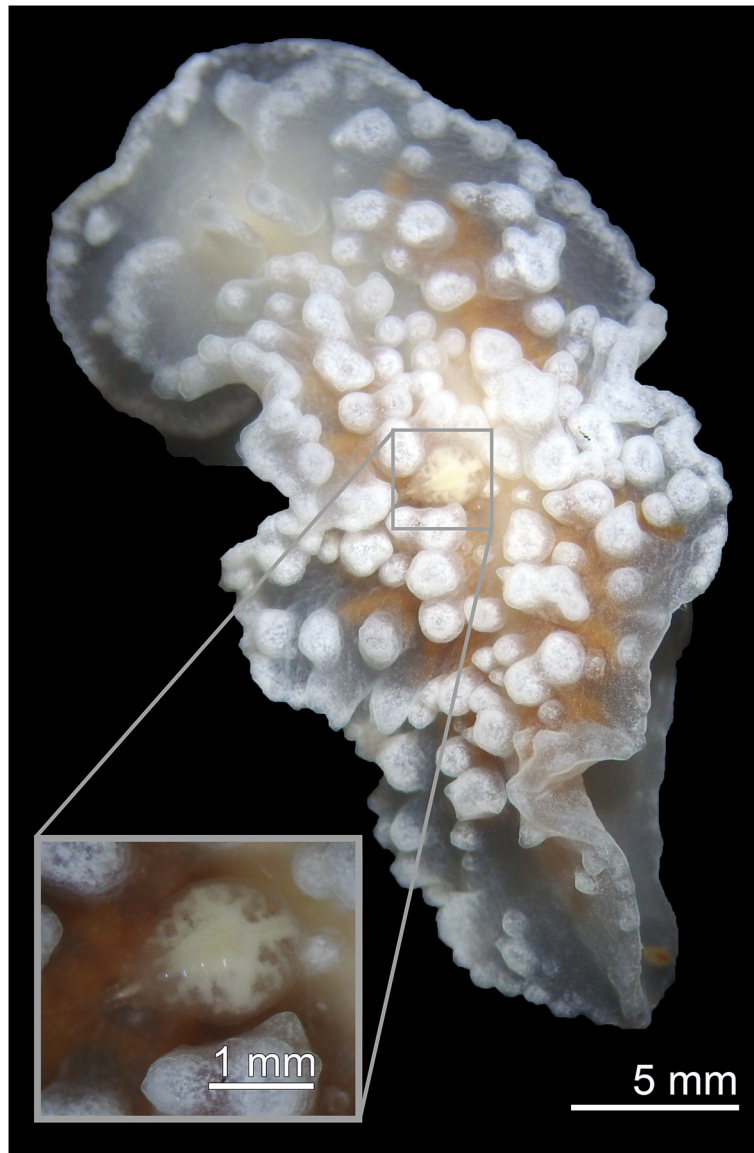

Fig. 1. The nudibranch *Charcotia granulosa* with a close up of the copepod *Anthessius antarcticus* n. sp. on the nudibranch's notum (alive). Picture taken at the "Gabriel de Castilla" Spanish Antarctic Base. This figure is published in colour in the online edition of this journal, which can be accessed via <http://booksandjournals.brillonline.com/content/journals/1937240x>.

(2007). Subsequently, the dried specimen was soaked in 0.5%  $\text{Na}_3\text{PO}_4$  for 10 min in order to return the specimen as close as possible to its original condition. The specimen was immersed in lactic acid before dissection and afterwards observed using the reverse slide method of Humes and Gooding (1964). All illustrations were drawn with the aid of a drawing tube mounted on an Olympus BH-2 microscope. In the armature formula of appendages, spines are indicated by Roman numerals and setae by Arabic numerals.

#### SYSTEMATICS

Order Poecilostomatoida Burmeister, 1835

Anthessiidae Humes, 1986

*Anthessius* Della Valle, 1880

*Anthessius antarcticus* n. sp.

(Figs. 1-5)

Types.—One ♀ (holotype) collected on the body surface (notum) of the nudibranch *Charcotia granulosa* Vayssière, 1906 (Charcotiidae) from Deception Island, South Shetland

Islands, Antarctica, 05 February 2013, collected by C. Avila and J. Moles. The holotype (dissected and mounted on a glass slide) has been deposited in the National Institute of Biological Resources (NIBR), Incheon, Korea (Catalog number NIBRIV0000293978).

Female.—Body (Figs. 2A, 3A) dorsoventrally flattened and 2.55 mm long, not including caudal setae. Prosome oval, 1.62 mm long along midline, representing about 64% of body length; greatest width 1.34 mm; length:width ratio = 1.21:1. Dorsal suture line distinct between cephalosome and first pedigerous somite. Posterolateral corners of all prosomal somites rounded. Third pedigerous somite longer than other pedigerous somites. Urosome (Fig. 3B) 5-segmented. First urosomite (fifth pedigerous somite) 458  $\mu\text{m}$  wide, much wider than genital double-somite, with tapering lateral margins. Genital double-somite and abdominal somites

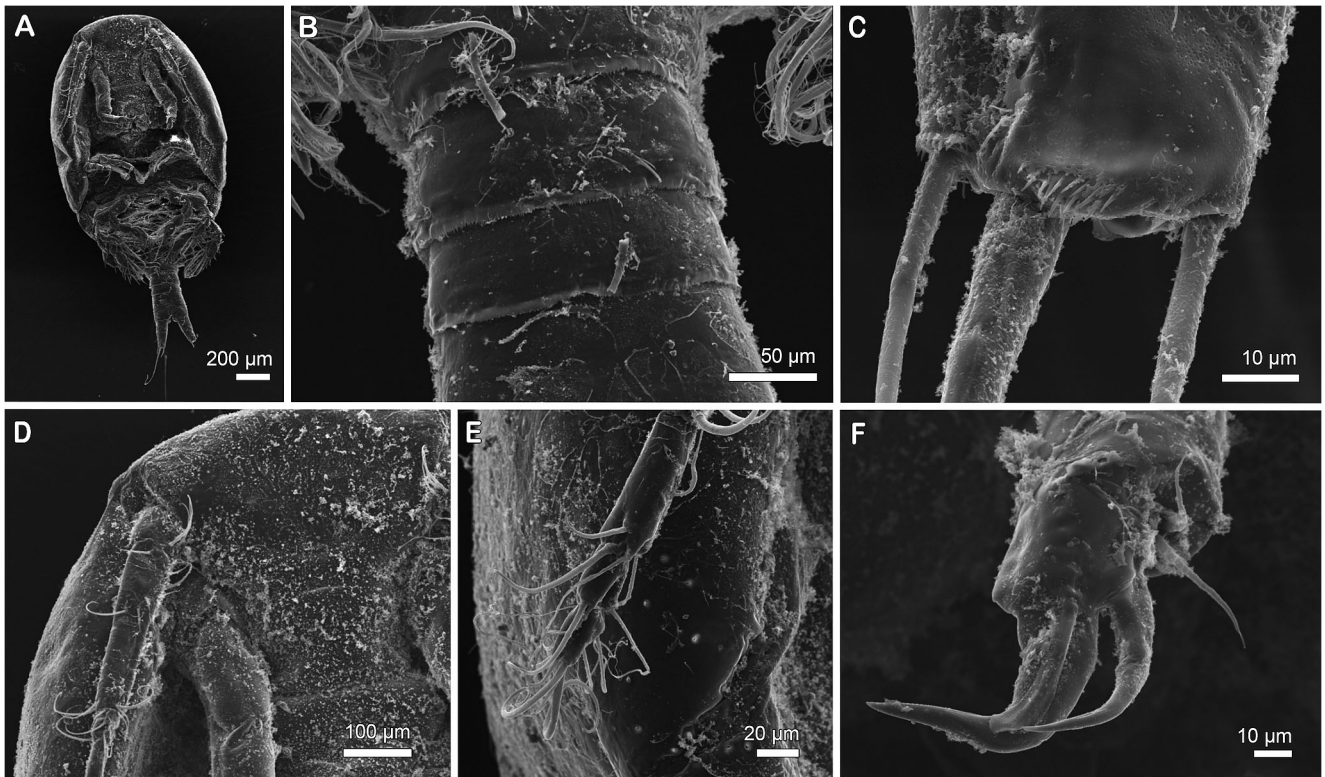

Fig. 2. Scanning electron micrographs of *Anthessius antarcticus* n. sp., female. A, habitus, ventral; B, abdomen, ventral; C, distal part of caudal ramus, ventral, showing setae III, IV, and VI; D, antero-lateral part of cephalothorax, ventral; E, distal part of antennules; F, distal part of antenna.

with finely pectinate posteroventral margins (Fig. 2B). Genital double-somite  $246 \times 385 \mu\text{m}$ , 1.57 times wider than long and consisting of strongly expanded anterior two-thirds and narrower posterior one-third ( $225 \mu\text{m}$  wide across this region), with narrow horizontal sclerotized band on dorsal anterior region and faint transverse line on dorsal surface at two-thirds of somite length; genital apertures large and located dorsolaterally. Three free abdominal somites  $80 \times 209$ ,  $80 \times 191$ , and  $188 \times 218 \mu\text{m}$  in length and width, respectively. Anal somite longer than two preceding somites combined, smooth without spinules or denticles on ventral surface, with distinct posteromedial notch and large anal area; anal operculum not prominent. Caudal rami slightly divergent and separated widely from each other; each ramus (Fig. 3C) tapering,  $192 \times 80 \mu\text{m}$  (length:width ratio = 2.40:1), probably with 6 setae, and with minute spinules at ventro-distal margin near bases of setae III and IV (Fig. 2C); two mid-terminal setae (setae IV and V) much longer than ramus; other setae shorter than ramus; insertion of outer lateral seta (seta II) about 45% of ramus length.

Rostral area broad, but rostrum absent (Figs. 2A, 3D). Antennule (Figs. 2D, E, 3E)  $735 \mu\text{m}$  long and 7-segmented; second segment longest,  $288 \mu\text{m}$  long (39% of length of antennule); fourth segment second-longest,  $146 \mu\text{m}$  long (20% of length of antennule); two terminal segments markedly short; first segment armed with 4 setae; armature formula of second to terminal segments (observed from SEM microphotographs) 15, 6, 3, 4 + aesthetasc, 2 + aesthetasc, and 7 + aesthetasc; all observed setae naked. Antenna (Fig. 3F) 3-segmented, consisting of basis and 2-

segmented endopod; basis about  $160 \times 110 \mu\text{m}$  in length and width, with 1 distal seta; proximal endopodal segment  $183 \times 108 \mu\text{m}$ , with 1 small subdistal seta; distal endopodal segment  $192 \times 96 \mu\text{m}$  (length:width ratio = 2.23:1), distinctly narrower than two proximal segments, and armed with 3 setae on medial margin, 3 setae on outer subdistal region, and 2 unequal claws and 2 setae distally (Fig. 2F); medial claw  $104 \mu\text{m}$  long, broad and strong; outer claw  $82 \mu\text{m}$  long, much narrower than medial one; all setae on antenna small.

Labrum (Figs. 3G, 4A) with divergent, tapering posterior lobes and shallow posteromedial incision, also with a pair of hyaline rims, each bearing row of fine spinules on medial region of incision. Mandible (Fig. 3H) with large distal and outer lashes; convex medial side with 2 dentiform elements, proximal one bifid and distal one quadrifid; distal lash serrate along proximal two-thirds of convex medial margin, but smooth along outer margin; outer lash slightly shorter than distal lash and also serrate along proximal region of medial margin; 1 slender but conspicuous seta present between distal and outer lashes (this seta about half as long as outer lash and spinulose on medial margin). Paragnath (Fig. 3I) as subglobular lobe bearing long spinules along medial margin. Maxillule (Fig. 4B) lamella-like, bearing 6 setae (or setiform elements) on distal margin, one of them much larger than others. Maxilla (Fig. 4C) 2-segmented; proximal segment very broad and unarmed; distal segment terminating in stiff spiniform process and armed with small proximal seta (seta III) with swollen basal portion, broad anterior seta (seta II), 4 large spines on subdistal region of convex outer

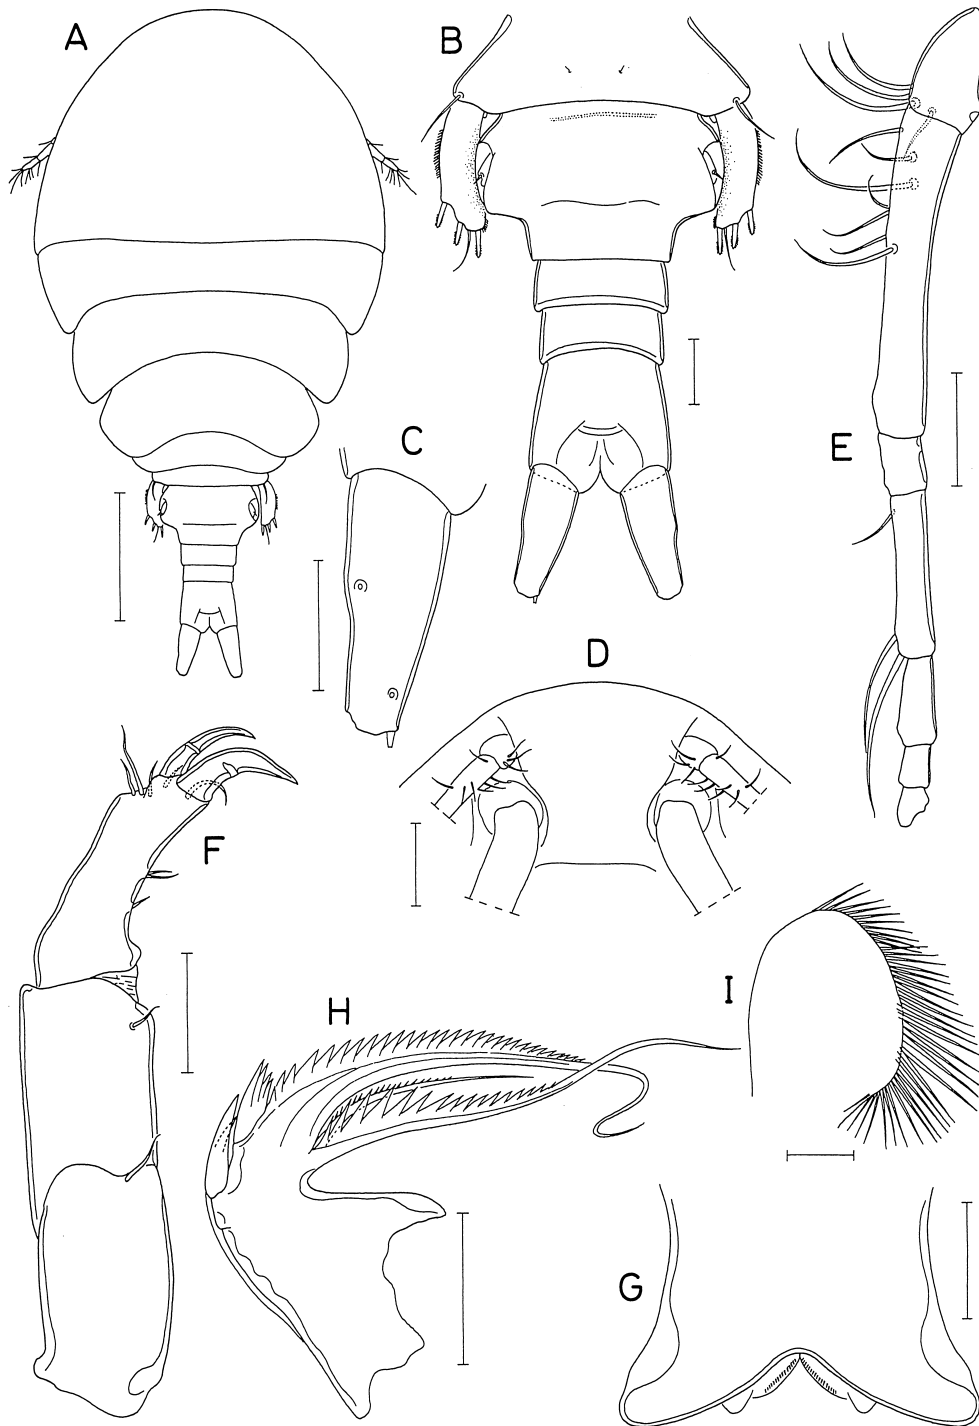

Fig. 3. *Anthessius antarcticus* n. sp., female. A, habitus, dorsal; B, urosome, dorsal; C, left caudal ramus, dorsal (setae omitted); D, rostral area, ventral; E, antennules (most of setae omitted); F, antenna; G, labrum; H, mandible; I, paragnath. Scale bars: A, 0.5 mm; B, C, E, F, 0.1 mm; D, 0.2 mm; G, H, 0.05 mm; I, 0.02 mm.

margin, and 3 denticles (including minute proximal one) on subdistal part of concave medial margin. Small pore present near insertion of anterior seta. Maxilliped (Fig. 4D) indistinctly 3-segmented; first segment unarmed; suture between first and second segments unclear, represented only by fine wrinkles; second segment with one rudimentary seta (minute knob) subdistally on medial margin; boundary between sec-

ond and third segments represented by lateral constriction; third segment tapering, apically, with small seta and small, blunt setiform process, and with flap-like expansion along outer side.

Legs 1-4 (Figs. 4E, F, 5A, B) with 3-segmented rami; outer seta on basis naked; all setae on coxa and rami pinnate; outer margin of endopodal segments with row of se-

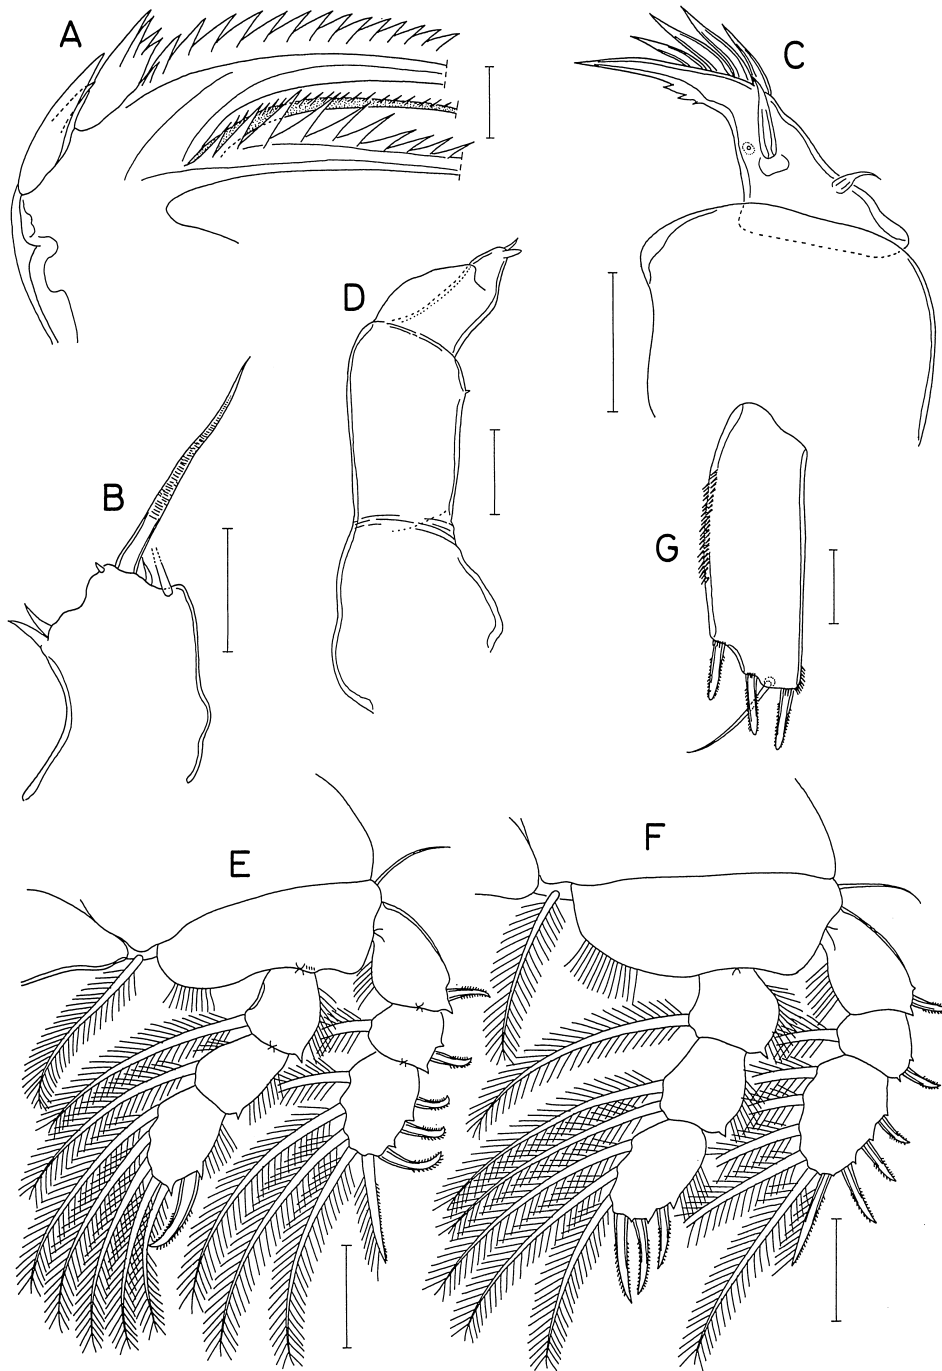

Fig. 4. *Anthessius antarcticus* n. sp., female. A, proximal region of mandibular lashes; B, maxillule; C, maxilla; D, maxilliped; E, leg 1; F, leg 2; G, exopod of leg 5. Scale bars: A, 0.02 mm; B-D, G, 0.05 mm; E, F, 0.1 mm.

tules; outer distal corners of first and second segments of the endopods with pointed process; outer margin of exopodal segments and third endopodal segments with pointed processes near base of outer spines; spines on endopods and outer spines on exopods slender and spinulose; medio-distal margin of basis with setules. Leg 3 similar to leg 2, except for bearing 4 spines and 2 setae on third endopodal segment. Armature formula of legs 1-4 presented in Table 1.

Leg 5 consisting of one dorsolateral seta on fifth pedigerous somite and free exopod. Exopod (Fig. 4G)  $195 \times 69 \mu\text{m}$

(length:width ratio = 2.83:1); outer margin slightly convex, with distal tuft of minute spinules near middle region; medial margin straight, with small distal tuft of minute spinules; distal margin armed with 3 rod-shaped, spinulose spines of similar length ( $40 \mu\text{m}$ ) and shape, and 1 naked seta; row of spinules present at bases of spines. Leg 6 represented by thick seta and spiniform element on genital operculum (Fig. 5C).

The color in life in transmitted light is translucent to white; the digestive system is whitish to creamy.

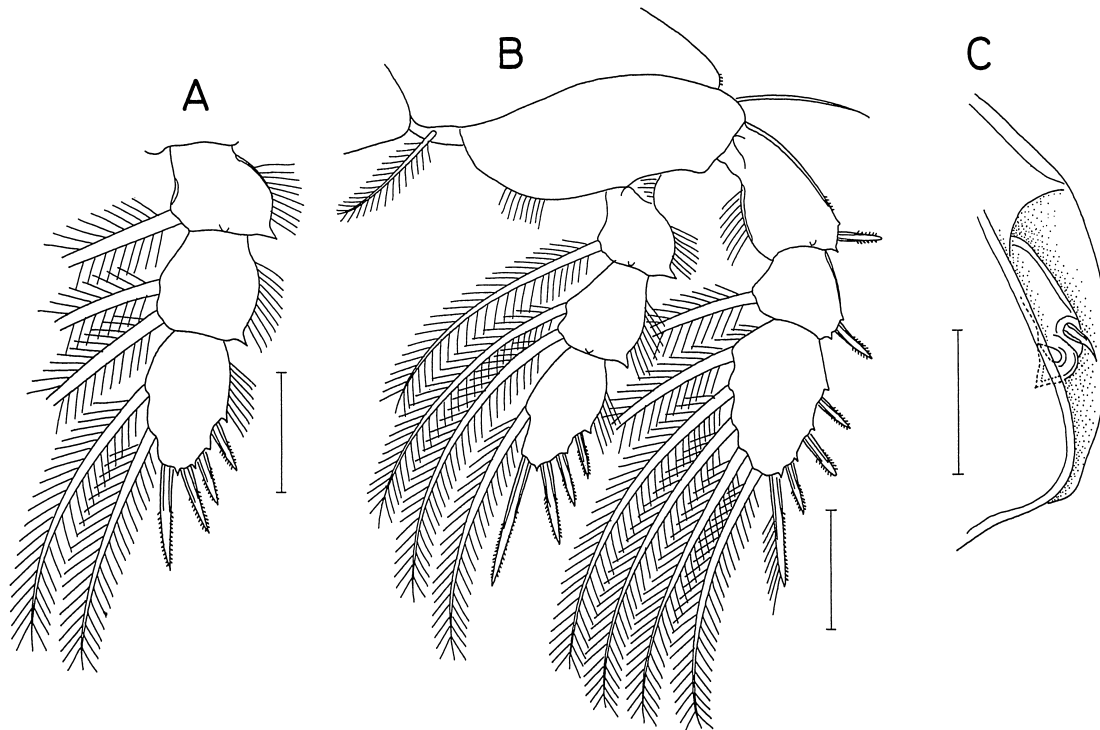

Fig. 5. *Anthessius antarcticus* n. sp., female. A, endopod of leg 3; B, leg 4; C, right genital aperture, dorsal. Scale bars: A, B, 0.1 mm; C, 0.05 mm.

Male.—Unknown.

**Etymology.**—The specific name is derived from the geographic area, Antarctica, from which the type specimen was collected. This is the first species of the genus, and the first Anthessiidae, described from there.

#### DISCUSSION

*Anthessius antarcticus* is clearly distinguished from its 44 congeners by the following combination of diagnostic features: 1) antenna with two terminal claws; 2) mandible with a seta between distal and outer lashes; 3) third exopodal segment of leg 4 with four spines and five setae (formula: III, I, 5); and 4) caudal ramus 2.40 times as long as wide. Among these characters, the first and second in particular seem to be phylogenetically valuable. A cladistic analysis of *Anthessius* done by Ho (1997) showed that the number of terminal claws on the antenna is important in the taxonomy of the genus. Species of this genus usually have three or four terminal claws on the antenna (Humes, 1986). Exceptions to this are represented by only two species: there are no claws in *A. brevifurca* Sewell, 1949, recovered from weed washings in the Maldive Islands (Sewell, 1949), and two

claws in *A. pinnae* Humes, 1959, is associated with a bivalve in Madagascar (Humes, 1959). *Anthessius antarcticus* is similar to *A. pinnae* in having two terminal claws on the antenna, but *A. pinnae* is clearly distinguished by other features: it has a rostrum (absent in *A. antarcticus*), the caudal ramus is about 3.4 times as long as wide (versus 2.4 times), the third exopodal segment of leg 4 bears three spines (versus four), and the mandible has no element between the distal and outer lashes (versus a seta) (Humes, 1959).

The second significant morphological feature of the new species, the presence of a prominent seta between the distal and outer lashes of the mandible seems to be unique within the genus *Anthessius*. In most species of this genus this element is absent as in *A. pinnae* Humes, 1958 and *A. nosybensis* Kim, 2009 (Humes, 1959; Kim, 2009) or it appears as a hyaline tapering foliaceous lamella as in *A. nortoni* Illg, 1960 and *A. pinctadae* Humes, 1973 (Illg, 1960; Humes, 1973), or bifurcate as in *A. brevicauda* (Leigh-Sharpe, 1934) (see Humes, 1973), and *A. saecularis* Stock, 1964 (Stock, 1964). Although in four species, viz., *A. arcuatus* López-González, Conradi, Naranjo, and García-Gómez, 1992, *A. concinnus* (A. Scott, 1909), *A. obtusispina* Ho, 1983, and *A. ovalipes* Stock, Humes, and Gooding, 1963 have an elongate linguiform extension of the mandible at this site, none of these four species or other congeners is known to have a true seta between the distal and outer lashes of the mandible, as observed in *A. antarcticus*.

Within Anthessiidae, however, such a seta is found between the distal and outer lashes in species of *Katanthesius* Stock, 1960. This genus consists of two known species: *K. delamarei* Stock, 1960 from the Mediterranean, and *K. stocki* Humes, 1997 from California, both found in asso-

Table 1. Spine and setal formula for swimming legs 1 to 4 of *Anthessius antarcticus* n. sp.

|       | Coxa | Basis | Exopod              | Endopod             |
|-------|------|-------|---------------------|---------------------|
| Leg 1 | 0-1  | 1-0   | I-0; I-1; III, I, 4 | 0-1; 0-1; I, 2, 3   |
| Leg 2 | 0-1  | 1-0   | I-0; I-1; III, I, 5 | 0-1; 0-2; II, I, 3  |
| Leg 3 | 0-1  | 1-0   | I-0; I-1; III, I, 5 | 0-1; 0-2; III, I, 2 |
| Leg 4 | 0-1  | 1-0   | I-0; I-1; III, I, 5 | 0-1; 0-2; III, I, 1 |

Table 2. *Anthessius* species associated with opisthobranch molluscs.

| Species of <i>Anthessius</i>                                                | Host species                                                                           | Order               | Reference                    |
|-----------------------------------------------------------------------------|----------------------------------------------------------------------------------------|---------------------|------------------------------|
| <i>A. antarcticus</i> n. sp.                                                | <i>Charcotia granulosa</i> Vayssière, 1906                                             | Nudibranchia        | Present study                |
| <i>A. arcuatus</i> López-González, Conradi, Naranjo, and García-Gómez, 1992 | <i>Berthella stellata</i> (Risso, 1826)                                                | Pleurobranchomorpha | López-González et al. (1992) |
| <i>A. dolabellae</i> Humes and Ho, 1965                                     | <i>Dolabella auricularia</i> (Lightfoot, 1786)                                         | Anaspidea           | Humes and Ho (1965)          |
| <i>A. hawaiiensis</i> (C. B. Wilson, 1921)                                  | <i>Pleurobranchus</i> Cuvier, 1804                                                     | Pleurobranchomorpha | Wilson (1935); Illg (1960)   |
| <i>A. lighti</i> Illg, 1960                                                 | <i>Aplysia californica</i> J. G. Cooper, 1863                                          | Anaspidea           | Illg (1960)                  |
| <i>A. navanacis</i> (C. B. Wilson, 1935)                                    | <i>Navanax inermis</i> (J. G. Cooper, 1862)                                            | Cephalaspidea       | Wilson (1935); Illg (1960)   |
| <i>A. obtusispina</i> Ho, 1983                                              | <i>Pleurobranchaea californica</i> MacFarland, 1966                                    | Pleurobranchomorpha | Ho (1983)                    |
| <i>A. ovalipes</i> Stock, Humes, and Gooding, 1963                          | <i>Pleurobranchus areolatus</i> Mörch, 1863                                            | Pleurobranchomorpha | Stock et al. (1963)          |
| <i>A. pleurobrancheae</i> Della Valle, 1880                                 | <i>Pleurobranchaea meckeli</i> (Blainville, 1825)                                      | Pleurobranchomorpha | Della Valle (1880)           |
| <i>A. proximus</i> Stock, Humes, and Gooding, 1963                          | <i>Dolabrifera dolabrifera</i> (Rang, 1828), <i>Petalifera petalifera</i> (Rang, 1828) | Anaspidea           | Stock et al. (1963)          |
| <i>A. stylocheili</i> Humes and Ho, 1965                                    | <i>Stylocheilus longicauda</i> (Quoy and Gaimard, 1825)                                | Anaspidea           | Humes and Ho (1965)          |
| <i>A. varidens</i> Stock, Humes, and Gooding, 1963                          | <i>Aplysia dactylomela</i> Rang, 1828, <i>Bursatella leachii</i> Blainville, 1817      | Anaspidea           | Stock et al. (1963)          |

ciation with nudibranch gastropods (Stock, 1960; Humes, 1997). It is assumed that this element between the distal and outer lashes is one of the five ancestral gnathobase elements of the mandible known in primitive poecilostomatoid families, such as the Oncaeiidae and Corycaeiidae of Huys and Boxshall (1991: 342), along with the two tooth-like elements on the convex side, and the distal and outer lashes. Therefore, the retention of the elongate setiform condition of the element in *Katanthessius* and *A. antarcticus* may be interpreted as a primitive condition of the mandible within Anthessiidae. In addition to having a similar form of the mandible and the same group of hosts (Nudibranchia), they also share a similar form of antenna, tipped with two claws. Nonetheless, it seems premature at present to treat them as congeneric; *Katanthessius* is currently differentiated from other anthessiid genera by the reduction of the segmentation and/or setation of the posterior swimming legs (Humes, 1986; Boxshall and Halsey, 2004a, b).

Among the 44 nominal species of the genus *Anthessius* described to date, only 11 are ectosymbionts of opisthobranch molluscs; concretely, five from Anaspidea, five from Pleurobranchomorpha, and one in Cephalaspidea (Table 2). *Anthessius antarcticus* n. sp. is only known to inhabit the notum of a nudibranch, *Charcotia granulosa*. As this association occurred at a low incidence (one ectosymbiosis out of 64 potential hosts) in the locality of Deception Island, it is not possible to suggest specificity of the copepod to a single host species (monoxenous development), even if it was not found on the other nudibranchs collected, *Doris kerguelensis* and *Cuthona crinita*. It seems reasonable to suggest that many species of *Anthessius* probably remain to be dis-

covered, since this is the first species described to date from Antarctica.

#### ACKNOWLEDGEMENTS

The authors wish to thank C. Angulo, M. Bas, J. Cristobo, L. Núñez-Pons, A. Riesgo, and S. Taboada for their support while SCUBA-diving. Thanks are also due to the “Gabriel de Castilla” Spanish Antarctic Base, for providing logistic support during the ACTIQUIM-4 cruise. Funding was provided by the Spanish government through the ACTIQUIM-II Project (CTM2010-17415/ANT).

#### REFERENCES

- Boxshall, G. A., and S. H. Halsey. 2004a. An Introduction to Copepod Diversity. Part I. The Ray Society, London.
- , and ———. 2004b. An Introduction to Copepod Diversity. Part II. The Ray Society, London.
- Conradi, M., I. Marin, and D. Martin. 2012. An unexpected parasitic relationship between a new species of *Anthessius* (Copepoda: Cyclopoida) and a decapod crustacean, *Alpheus macrocheles* (Hailstone, 1835) from the NW Mediterranean Sea. *Journal of Crustacean Biology* 32: 860-887.
- Della Valle, A. 1880. Sui Coriceidi parassiti, e sul'anatomia del gen. *Lichomolgus*. *Mittheilungen aus der Zoologischen Station zu Neapel* 2: 83-106, pls. 5, 6.
- Ho, J.-S. 1983. A new species of copepod associated with *Pleurobranchaea californica* (Gastropoda: Opisthobranchia) with discussion on *Anthessius* associated with notaspidean sea slugs. *Veliger* 25: 393-398, Figs. 1-3.
- . 1997. Cladistics of the *Anthessius* Della Valle, 1880: a major genus of poecilostome copepods parasitic in Mollusca. *Phuket Marine Biological Center Special Publication* 17: 483-493.
- Humes, A. G. 1959. Copépodes parasites de mollusques à Madagascar. *Mémoires de l'Institut Scientifique de Madagascar (série F)* 2: 285-342.
- . 1973. Cyclopoid copepods associated with marine bivalve mollusks in New Caledonia. *Cahiers de l'Office de la Recherche Scientifique et Technique Outre-Mer (ORSTOM), Série Océanographie* 11: 3-25.
- . 1986. *Mycicola metisiensis* (Copepoda: Poecilostomatoida), a parasite of the bivalve *Mya arenaria* in eastern Canada, redefinition of the

- Mycolidae, and diagnosis of the Anthessiidae n. fam. Canadian Journal of Zoology 64: 1021-1033.
- . 1997. New poecilostomatoid copepod (Anthessiidae) associated with the opisthobranch *Discodoris heathi* off California. Beaufortia 47: 163-167.
- , and R. U. Gooding. 1964. A method for studying the external anatomy of copepods. Crustaceana 6: 238-240.
- , and J.-S. Ho. 1965. New species of the genus *Anthessius* (Copepoda, Cyclopoida) associated with mollusks in Madagascar. Cahiers de l'Office de la Recherche Scientifique et Technique Outre-Mer (ORSTOM), Série Océanographie 3: 78-113, figs. 1-88.
- Huys, R., and G. A. Boxshall. 1991. Copepod Evolution. The Ray Society, London.
- Illg, P. L. 1960. Marine copepods of the genus *Anthessius* from the northeastern Pacific Ocean. Pacific Science 14: 337-372.
- Kim, I.-H. 2009. Poecilostome copepods (Crustacea: Cyclopoida) associated with marine invertebrates from tropical waters. Korean Journal of Systematic Zoology, Special Issue 7: 1-90.
- Leslie, S. A., and J. C. Mitchell. 2007. Removing gold coating from SEM samples. Palaeontology 50: 1459-1461.
- López-González, P. J., M. Conradi, S. Naranjo, and J. C. García-Gómez. 1992. A new species of *Anthessius* (Copepoda: Poecilostomatoida) associated with *Berthella stellata* (Risso, 1826) (Gastropoda: Opisthobranchia). Proceedings of the Biological Society of Washington 105: 240-248.
- Sewell, R. B. S. 1949. The littoral and semi-parasitic Cyclopoida, the Monstrilloida and Notodelphyoida. The John Murray Expedition 1933-34. Scientific Reports 9(2): 17-199.
- Stock, J. H. 1960. Sur quelques copépodes associés aux invertébrés des côtes du Roussillon. Crustaceana 1: 218-257.
- . 1964. Sur deux espèces d'*Anthessius* (Copepoda) des Indes Orientales. Zoologische Mededelingen 39: 111-124.
- , A. G. Humes, and R. U. Gooding. 1963. Copepoda associated with West Indian invertebrates – III. The genus *Anthessius* (Cyclopoida, Mycolidae). Studies on the Fauna of Curaçao 17(73): 1-37, figs. 1-16.
- Uyeno, D., and K. Nagasawa. 2012. New species of the copepod genus *Anthessius* Della Valle, 1880 (Poecilostomatoida: Anthessiidae) from *Turbo marmoratus* Linnaeus (Gastropoda: Turbinidae) collected during the Kumejima 2009 Expedition. Zootaxa 3367: 60-68.
- Walter, T. C., and G. Boxshall. 2014. World of Copepods database. Available online at <http://www.marinespecies.org/copepoda> on 2014-07-31.
- Wilson, C. B. 1935. Parasitic copepods from the Pacific coast. American Midland Naturalist 16: 776-797, pls. 25-30.

RECEIVED: 15 June 2014.

ACCEPTED: 22 September 2014.

AVAILABLE ONLINE: 7 November 2014.
